# Supplementary material for: A Benders Decomposition Approach for the Multivehicle Production Routing Problem with Order-up-to-Level Policy
Source: Atypon-hosted journal article supplement (doi:10.1287/trsc.2019.0964), 2020-08-19
Supplement: trsc.2019.0964.sm1.pdf [file trsc.2019.0964.sm1.pdf]

## Appendix: Detailed Results on the Multi-Vehicle VMIRP

The notation used in tables (1)-(4) is the same as described in Section 5.1 about the MVPRP. Moreover, column “*id*” is used to denote the instance identifier. Concerning method EXM, a symbol “-” indicates that EXM runs out of memory or no feasible solution was found by EXM.

Table 1: Results on multi-vehicle VMIRP instances with three periods and low inventory costs

| Adulyasak et al. (2014) |   |   |    |                |       |        |       |             |                |         |       |         |        |                |     |
|-------------------------|---|---|----|----------------|-------|--------|-------|-------------|----------------|---------|-------|---------|--------|----------------|-----|
| n                       | l | m | id | Veh-Ind        |       |        |       | Non-Veh-Ind |                |         |       | EXM     |        |                |     |
|                         |   |   |    | Best           | ub    | %lb    | t     | %lb         | t              | ub      | lb    | %lb     | t      | t <sub>S</sub> | %rc |
| 5                       | 3 | 2 | 1  | 1396.33        | 100.0 | 0.1    | 100.0 | 0.1         | 1396.33        | 1396.33 | 100.0 | 0.7     | 0.0    | 93.2           |     |
| 5                       | 3 | 2 | 2  | 1437.90        | 100.0 | 0.0    | 100.0 | 0.0         | 1437.90        | 1437.90 | 100.0 | 0.7     | 0.0    | 93.8           |     |
| 5                       | 3 | 2 | 3  | 2468.94        | 100.0 | 0.1    | 100.0 | 0.3         | 2468.94        | 2468.94 | 100.0 | 0.8     | 0.0    | 94.4           |     |
| 5                       | 3 | 2 | 4  | 1717.43        | 100.0 | 0.0    | 100.0 | 0.1         | 1717.43        | 1717.43 | 100.0 | 0.7     | 0.0    | 96.2           |     |
| 5                       | 3 | 2 | 5  | 1224.63        | 100.0 | 0.0    | 100.0 | 0.0         | 1224.63        | 1224.63 | 100.0 | 0.7     | 0.0    | 89.1           |     |
| 5                       | 3 | 3 | 1  | 1540.57        | 100.0 | 0.1    | 100.0 | 0.1         | 1540.57        | 1540.57 | 100.0 | 0.6     | 0.0    | 93.9           |     |
| 5                       | 3 | 3 | 2  | 1720.83        | 100.0 | 0.1    | 100.0 | 0.1         | 1720.83        | 1720.83 | 100.0 | 0.5     | 0.0    | 94.8           |     |
| 5                       | 3 | 3 | 3  | 3503.33        | 100.0 | 0.0    | 100.0 | 0.1         | 3503.33        | 3503.33 | 100.0 | 0.7     | 0.0    | 96.0           |     |
| 5                       | 3 | 3 | 4  | 2552.79        | 100.0 | 0.0    | 100.0 | 0.1         | 2552.79        | 2552.79 | 100.0 | 0.5     | 0.0    | 97.5           |     |
| 5                       | 3 | 3 | 5  | 1682.44        | 100.0 | 0.0    | 100.0 | 0.1         | 1682.44        | 1682.44 | 100.0 | 0.6     | 0.0    | 92.0           |     |
| 10                      | 3 | 2 | 1  | 2468.22        | 100.0 | 1.8    | 100.0 | 1.7         | 2468.22        | 2468.22 | 100.0 | 4.6     | 1.5    | 87.6           |     |
| 10                      | 3 | 2 | 2  | 3166.19        | 100.0 | 2.9    | 100.0 | 3.5         | 3166.19        | 3166.19 | 100.0 | 6.4     | 2.9    | 91.8           |     |
| 10                      | 3 | 2 | 3  | 2449.10        | 100.0 | 1.2    | 100.0 | 1.6         | 2449.10        | 2449.10 | 100.0 | 3.4     | 0.5    | 90.1           |     |
| 10                      | 3 | 2 | 4  | 2859.45        | 100.0 | 2.7    | 100.0 | 5.4         | 2859.45        | 2859.45 | 100.0 | 5.8     | 3.0    | 91.4           |     |
| 10                      | 3 | 2 | 5  | 2486.41        | 100.0 | 1.6    | 100.0 | 2.6         | 2486.41        | 2486.41 | 100.0 | 5.3     | 2.2    | 87.2           |     |
| 10                      | 3 | 3 | 1  | 2914.09        | 100.0 | 4.1    | 100.0 | 5.2         | 2914.09        | 2914.09 | 100.0 | 2.6     | 0.6    | 89.5           |     |
| 10                      | 3 | 3 | 2  | 3641.19        | 100.0 | 7.1    | 100.0 | 3.3         | 3641.19        | 3641.19 | 100.0 | 2.4     | 0.5    | 92.9           |     |
| 10                      | 3 | 3 | 3  | 2734.10        | 100.0 | 2.4    | 100.0 | 1.3         | 2734.10        | 2734.10 | 100.0 | 2.0     | 0.2    | 91.1           |     |
| 10                      | 3 | 3 | 4  | 3318.99        | 100.0 | 7.2    | 100.0 | 10.8        | 3318.99        | 3318.99 | 100.0 | 4.2     | 2.2    | 92.6           |     |
| 10                      | 3 | 3 | 5  | 2704.71        | 100.0 | 3.3    | 100.0 | 1.5         | 2704.71        | 2704.71 | 100.0 | 3.0     | 0.6    | 88.3           |     |
| 15                      | 3 | 2 | 1  | 2631.53        | 100.0 | 7.3    | 100.0 | 8.5         | 2631.53        | 2631.53 | 100.0 | 19.8    | 2.4    | 85.5           |     |
| 15                      | 3 | 2 | 2  | 2907.34        | 100.0 | 5.2    | 100.0 | 36.5        | 2907.34        | 2907.34 | 100.0 | 27.5    | 5.9    | 87.4           |     |
| 15                      | 3 | 2 | 3  | 3081.56        | 100.0 | 4.9    | 100.0 | 5.3         | 3081.56        | 3081.56 | 100.0 | 18.0    | 1.4    | 86.1           |     |
| 15                      | 3 | 2 | 4  | 2745.98        | 100.0 | 3.6    | 100.0 | 24.3        | 2745.98        | 2746.98 | 100.0 | 23.1    | 6.1    | 88.6           |     |
| 15                      | 3 | 2 | 5  | 2862.50        | 100.0 | 6.1    | 100.0 | 58.9        | 2862.50        | 2862.50 | 100.0 | 24.5    | 6.4    | 89.2           |     |
| 15                      | 3 | 3 | 1  | 2928.16        | 100.0 | 12.5   | 100.0 | 109.3       | 2928.16        | 2928.16 | 100.0 | 9.7     | 1.6    | 87.1           |     |
| 15                      | 3 | 3 | 2  | 3217.61        | 100.0 | 17.3   | 100.0 | 88.2        | 3217.61        | 3217.61 | 100.0 | 19.0    | 6.3    | 88.5           |     |
| 15                      | 3 | 3 | 3  | 3401.56        | 100.0 | 20.3   | 100.0 | 36.3        | 3401.56        | 3401.56 | 100.0 | 10.7    | 1.9    | 87.4           |     |
| 15                      | 3 | 3 | 4  | 2961.29        | 100.0 | 10.6   | 100.0 | 12.2        | 2961.29        | 2961.29 | 100.0 | 12.2    | 3.2    | 89.5           |     |
| 15                      | 3 | 3 | 5  | 3302.02        | 100.0 | 35.0   | 100.0 | 170.4       | 3302.02        | 3302.02 | 100.0 | 17.7    | 6.3    | 90.6           |     |
| 20                      | 3 | 2 | 1  | 3398.29        | 100.0 | 128.1  | 100.0 | 278.4       | 3398.29        | 3398.29 | 100.0 | 364.0   | 123.5  | 85.2           |     |
| 20                      | 3 | 2 | 2  | 2925.55        | 100.0 | 18.9   | 100.0 | 21.9        | 2925.55        | 2925.55 | 100.0 | 105.6   | 29.0   | 82.4           |     |
| 20                      | 3 | 2 | 3  | 3401.56        | 100.0 | 50.1   | 100.0 | 128.0       | 3401.56        | 3401.56 | 100.0 | 117.6   | 28.7   | 84.1           |     |
| 20                      | 3 | 2 | 4  | 3837.54        | 100.0 | 64.7   | 99.2  | 7200.0      | 3837.54        | 3837.54 | 100.0 | 243.5   | 71.8   | 89.0           |     |
| 20                      | 3 | 2 | 5  | 3957.49        | 100.0 | 73.9   | 100.0 | 1331.3      | 3957.49        | 3957.49 | 100.0 | 1998.8  | 356.8  | 85.7           |     |
| 20                      | 3 | 3 | 1  | 3809.57        | 100.0 | 337.3  | 100.0 | 1552.4      | 3809.57        | 3809.57 | 100.0 | 976.4   | 94.5   | 86.7           |     |
| 20                      | 3 | 3 | 2  | 3063.77        | 100.0 | 67.4   | 100.0 | 95.0        | 3063.77        | 3063.77 | 100.0 | 49.0    | 12.6   | 83.2           |     |
| 20                      | 3 | 3 | 3  | 3805.55        | 100.0 | 359.3  | 100.0 | 5953.2      | 3805.55        | 3805.55 | 100.0 | 309.6   | 46.0   | 85.8           |     |
| 20                      | 3 | 3 | 4  | 4447.93        | 100.0 | 899.0  | 95.4  | 7200.0      | 4447.93        | 4447.93 | 100.0 | 1697.7  | 147.0  | 90.4           |     |
| 20                      | 3 | 3 | 5  | 4581.99        | 100.0 | 882.3  | 97.4  | 7200.0      | 4581.99        | 4581.99 | 100.0 | 5524.8  | 242.8  | 87.7           |     |
| 25                      | 3 | 2 | 1  | 3569.23        | 100.0 | 25.7   | 100.0 | 164.8       | 3569.23        | 3569.23 | 100.0 | 5061.4  | 4598.9 | 83.4           |     |
| 25                      | 3 | 2 | 2  | 3904.97        | 100.0 | 447.8  | 100.0 | 1798.3      | 3904.97        | 3904.97 | 100.0 | 2678.3  | 1253.8 | 83.7           |     |
| 25                      | 3 | 2 | 3  | 4006.11        | 100.0 | 93.3   | 100.0 | 434.5       | 4006.11        | 4006.11 | 100.0 | 1332.8  | 984.2  | 82.2           |     |
| 25                      | 3 | 2 | 4  | 3510.77        | 100.0 | 32.6   | 100.0 | 100.5       | 3510.77        | 3510.77 | 100.0 | 5254.6  | 5015.2 | 82.8           |     |
| 25                      | 3 | 2 | 5  | 3857.48        | 100.0 | 39.5   | 100.0 | 20.0        | 3857.48        | 3857.48 | 100.0 | 608.6   | 194.5  | 79.3           |     |
| 25                      | 3 | 3 | 1  | 3927.38        | 100.0 | 219.8  | 100.0 | 1521.0      | 3927.38        | 3927.38 | 100.0 | 3224.5  | 262.4  | 84.9           |     |
| 25                      | 3 | 3 | 2  | 4278.43        | 100.0 | 1609.5 | 97.0  | 7200.0      | 4278.43        | 4278.43 | 100.0 | 5016.6  | 524.7  | 85.1           |     |
| 25                      | 3 | 3 | 3  | 4658.61        | 100.0 | 1890.2 | 98.9  | 7200.0      | 4658.61        | 4613.86 | 99.0  | 7200.3  | 370.4  | 84.7           |     |
| 25                      | 3 | 3 | 4  | 3936.55        | 100.0 | 238.8  | 98.3  | 7200.0      | 3936.55        | 3936.55 | 100.0 | 697.4   | 171.0  | 84.7           |     |
| 25                      | 3 | 3 | 5  | 4550.44        | 100.0 | 1218.0 | 100.0 | 5702.7      | 4550.44        | 4392.76 | 96.5  | 7200.3  | 2061.4 | 82.5           |     |
| 30                      | 3 | 3 | 1  | <b>4697.49</b> | 100.0 | 2956.4 | 97.1  | 7200.0      | -              | 4623.26 | -     | 7201.7  | 7037.8 | -              |     |
| 30                      | 3 | 3 | 2  | 4296.11        | 100.0 | 334.6  | 100.0 | 4168.2      | 4296.11        | 4187.66 | 97.5  | 7200.3  | 1420.9 | 80.3           |     |
| 30                      | 3 | 3 | 3  | 4272.41        | 100.0 | 2256.8 | 98.7  | 7200.0      | 4272.41        | 4272.41 | 100.0 | 2995.8  | 373.7  | 77.1           |     |
| 30                      | 3 | 3 | 4  | 4238.99        | 100.0 | 4683.7 | 95.7  | 7200.0      | 4238.99        | 4139.71 | 97.7  | 7200.3  | 2951.0 | 83.2           |     |
| 30                      | 3 | 3 | 5  | 3987.55        | 100.0 | 5038.9 | 93.8  | 7200.0      | 3987.55        | 3962.85 | 99.4  | 7200.3  | 794.2  | 80.7           |     |
| 30                      | 3 | 4 | 1  | <b>5297.66</b> | 89.1  | 7200.0 | 92.7  | 7200.0      | 5318.99        | 5136.46 | 96.6  | 7200.3  | 1976.9 | 81.9           |     |
| 30                      | 3 | 4 | 2  | 4634.58        | 100.0 | 4129.9 | 97.4  | 7200.0      | 4634.58        | 4614.99 | 99.6  | 7200.3  | 1575.1 | 81.8           |     |
| 30                      | 3 | 4 | 3  | 4569.05        | 92.3  | 7200.0 | 95.5  | 7200.0      | 4569.05        | 4575.04 | 99.5  | 7200.3  | 221.7  | 78.6           |     |
| 30                      | 3 | 4 | 4  | <b>4701.86</b> | 87.2  | 7200.0 | 93.8  | 7200.0      | 4915.80        | 4595.86 | 93.5  | 7201.0  | 4912.1 | 85.6           |     |
| 30                      | 3 | 4 | 5  | 4348.99        | 90.3  | 7200.0 | 92.8  | 7200.0      | 4348.99        | 4348.99 | 100.0 | 6138.5  | 334.7  | 82.3           |     |
| 35                      | 3 | 3 | 1  | <b>4473.28</b> | 100.0 | 2808.1 | 95.5  | 7200.0      | 4480.41        | 4385.81 | 97.9  | 7200.4  | 2684.0 | 79.7           |     |
| 35                      | 3 | 3 | 2  | <b>4438.80</b> | 100.0 | 1903.8 | 97.2  | 7200.0      | 4637.46        | 4334.65 | 93.5  | 7202.9  | 6501.0 | 83.4           |     |
| 35                      | 3 | 3 | 3  | <b>5249.48</b> | 98.8  | 7200.0 | 97.6  | 7200.0      | -              | 5085.47 | -     | 7200.38 | 7061.6 | -              |     |
| 35                      | 3 | 3 | 4  | <b>4678.54</b> | 88.1  | 7200.0 | 92.8  | 7200.0      | 5689.84        | 4427.38 | 77.8  | 7206.84 | 7024.0 | 86.1           |     |
| 35                      | 3 | 3 | 5  | <b>4326.68</b> | 95.1  | 7200.0 | 97.5  | 7200.0      | 5766.29        | 4268.16 | 74.0  | 7205.17 | 7002.6 | 85.5           |     |
| 35                      | 3 | 4 | 1  | <b>4980.59</b> | 87.7  | 7200.0 | 92.4  | 7200.0      | 5026.70        | 4841.08 | 96.3  | 7200.22 | 3398.9 | 81.9           |     |
| 35                      | 3 | 4 | 2  | <b>4872.03</b> | 95.9  | 7200.0 | 94.5  | 7200.0      | 5291.20        | 4757.27 | 89.9  | 7210.38 | 7011.6 | 85.4           |     |
| 35                      | 3 | 4 | 3  | 6029.70        | 86.9  | 7200.0 | 89.4  | 7200.0      | <b>5939.48</b> | 5687.89 | 95.8  | 7200.26 | 6653.0 | 81.3           |     |
| 35                      | 3 | 4 | 4  | 5169.84        | 80.4  | 7200.0 | 90.4  | 7200.0      | <b>5102.75</b> | 4936.52 | 96.7  | 7200.25 | 4619.8 | 84.5           |     |
| 35                      | 3 | 4 | 5  | 4958.01        | 83.5  | 7200.0 | 91.1  | 7200.0      | <b>4873.60</b> | 4763.18 | 97.7  | 7203.13 | 7067.2 | 82.8           |     |
| 40                      | 3 | 3 | 1  | <b>5009.71</b> | 93.7  | 7200.0 | 92.7  | 7200.0      | -              | 4974.97 | -     | 7206.97 | 7010.0 | -              |     |
| 40                      | 3 | 3 | 2  | <b>4742.39</b> | 100.0 | 6590.6 | 100.0 | 7200.0      | 6303.64        | 4574.25 | 72.6  | 7201.65 | 6590.4 | 86.7           |     |
| 40                      | 3 | 3 | 3  | <b>4747.71</b> | 96.4  | 7200.0 | 97.6  | 7200.0      | 6071.46        | 4642.03 | 76.5  | 7208.33 | 7003.0 | 82.1           |     |
| 40                      | 3 | 3 | 4  | <b>4580.04</b> | 96.2  | 7200.0 | 93.9  | 7200.0      | 4743.90        | 4423.22 | 93.2  | 7208.7  | 6722.4 | 81.6           |     |
| 40                      | 3 | 3 | 5  | <b>4612.63</b> | 99.1  | 7200.0 | 95.2  | 7200.0      | 5760.28        | 4558.94 | 79.1  | 7205.2  | 7007.2 | 81.7           |     |
| 40                      | 3 | 4 | 1  | 6025.70        | 74.8  | 7200.0 | 83.4  | 7200.0      | <b>5916.45</b> | 5504.21 | 93.0  | 7200.4  | 6890.5 | 81.9           |     |
| 40                      | 3 | 4 | 2  | <b>5622.76</b> | 81.4  | 7200.0 | 86.5  | 7200.0      | 7858.53        | 5156.13 | 65.6  | 7207.7  | 6974.5 | 89.3           |     |
| 40                      | 3 | 4 | 3  | <b>5136.06</b> | 90.0  | 7200.0 | 92.9  | 7200.0      | 6013.13        | 4984.39 | 82.9  | 7201.7  | 7002.6 | 81.8           |     |
| 40                      | 3 | 4 | 4  | <b>4855.93</b> | 85.9  | 7200.0 | 95.2  | 7200.0      | 5241.75        | 4787.40 | 96.9  | 7202.7  | 6664.8 | 82.3           |     |
| 40                      | 3 | 4 | 5  | <b>5213.30</b> | 87.3  | 7200.0 | 90.5  | 7200.0      | 5355.59        | 5051.54 | 94.3  | 7208.8  | 6940.8 | 80.3           |     |
| 45                      | 3 | 3 | 1  | <b>5039.51</b> | n/a   | n/a    | n/a   | n/a         | -              | 4885.92 | -     | 7204.8  | 7004.1 | -              |     |
| 45                      | 3 | 3 | 2  | <b>5296.04</b> | n/a   | n/a    | n/a   | n/a         | -              | 5155.97 | -     | 7204.8  | 7004.1 | -              |     |
| 45                      | 3 | 3 | 3  | <b>4754.62</b> | n/a   | n/a    | n/a   | n/a         | 5360.59        | 4622.71 | 86.2  | 7207.0  | 6913.1 | 77.3           |     |
| 45                      | 3 | 3 | 4  | <b>5458.59</b> | n/a   | n/a    | n/a   | n/a         | 7922.57        | 5229.54 | 66.0  | 7204.6  | 5352.3 | 86.4           |     |
| 45                      | 3 | 3 | 5  | <b>4374.87</b> | n/a   | n/a    | n/a   | n/a         | 7280.24        | 4305.89 | 5     |         |        |                |     |

Table 2: Results on multi-vehicle VMIRP instances with three periods and high inventory costs

|    |   |   |    | Adulyasak et al. (2014) |       |        |       |             |                 |          |       | EXM    |        |      |   |                |     |
|----|---|---|----|-------------------------|-------|--------|-------|-------------|-----------------|----------|-------|--------|--------|------|---|----------------|-----|
| n  | l | m | id | Veh-Ind                 |       |        |       | Non-Veh-Ind |                 |          |       | ub     | lb     | %lb  | t | t <sub>S</sub> | %rc |
|    |   |   |    | Best ub                 | %lb   | t      | %lb   | t           | %lb             | t        |       |        |        |      |   |                |     |
| 5  | 3 | 2 | 1  | 2266.61                 | 100.0 | 0.1    | 100.0 | 0.1         | 2266.61         | 2266.61  | 100.0 | 0.8    | 0.0    | 57.4 |   |                |     |
| 5  | 3 | 2 | 2  | 2229.38                 | 100.0 | 0.0    | 100.0 | 0.0         | 2229.38         | 2229.38  | 100.0 | 0.7    | 0.0    | 60.5 |   |                |     |
| 5  | 3 | 2 | 3  | 3698.48                 | 100.0 | 0.1    | 100.0 | 0.2         | 3698.48         | 3698.48  | 100.0 | 0.9    | 0.0    | 63.0 |   |                |     |
| 5  | 3 | 2 | 4  | 2302.44                 | 100.0 | 0.1    | 100.0 | 0.0         | 2302.44         | 2302.44  | 100.0 | 0.8    | 0.0    | 71.8 |   |                |     |
| 5  | 3 | 2 | 5  | 2413.72                 | 100.0 | 0.0    | 100.0 | 0.0         | 2413.72         | 2413.72  | 100.0 | 0.8    | 0.0    | 45.2 |   |                |     |
| 5  | 3 | 3 | 1  | 2414.03                 | 100.0 | 0.1    | 100.0 | 0.1         | 2414.03         | 2414.03  | 100.0 | 0.6    | 0.0    | 59.9 |   |                |     |
| 5  | 3 | 3 | 2  | 2511.05                 | 100.0 | 0.1    | 100.0 | 0.1         | 2511.05         | 2511.05  | 100.0 | 0.6    | 0.0    | 65.0 |   |                |     |
| 5  | 3 | 3 | 3  | 4753.03                 | 100.0 | 0.0    | 100.0 | 0.1         | 4753.03         | 4753.03  | 100.0 | 0.8    | 0.0    | 70.8 |   |                |     |
| 5  | 3 | 3 | 4  | 3132.21                 | 100.0 | 0.0    | 100.0 | 0.1         | 3132.21         | 3132.21  | 100.0 | 0.7    | 0.0    | 79.5 |   |                |     |
| 5  | 3 | 3 | 5  | 2875.58                 | 100.0 | 0.0    | 100.0 | 0.1         | 2875.58         | 2875.58  | 100.0 | 0.7    | 0.0    | 53.8 |   |                |     |
| 10 | 3 | 2 | 1  | 5263.22                 | 100.0 | 1.4    | 100.0 | 0.9         | 5263.22         | 5263.22  | 100.0 | 6.1    | 2.9    | 41.1 |   |                |     |
| 10 | 3 | 2 | 2  | 5464.48                 | 100.0 | 2.9    | 100.0 | 3.2         | 5464.48         | 5464.48  | 100.0 | 9.2    | 5.2    | 53.2 |   |                |     |
| 10 | 3 | 2 | 3  | 4630.08                 | 100.0 | 1.1    | 100.0 | 1.2         | 4630.08         | 4630.08  | 100.0 | 4.7    | 1.3    | 47.6 |   |                |     |
| 10 | 3 | 2 | 4  | 5031.00                 | 100.0 | 3.2    | 100.0 | 7.2         | 5031.00         | 5031.00  | 100.0 | 5.6    | 2.2    | 52.3 |   |                |     |
| 10 | 3 | 2 | 5  | 5318.75                 | 100.0 | 1.7    | 100.0 | 2.5         | 5318.75         | 5318.75  | 100.0 | 6.1    | 2.6    | 41.0 |   |                |     |
| 10 | 3 | 3 | 1  | 5714.31                 | 100.0 | 3.7    | 100.0 | 5.7         | 5714.31         | 5714.31  | 100.0 | 2.6    | 0.3    | 45.6 |   |                |     |
| 10 | 3 | 3 | 2  | 5938.08                 | 100.0 | 7.3    | 100.0 | 3.4         | 5938.08         | 5938.08  | 100.0 | 3.2    | 0.8    | 57.0 |   |                |     |
| 10 | 3 | 3 | 3  | 4919.04                 | 100.0 | 1.8    | 100.0 | 1.3         | 4919.04         | 4919.04  | 100.0 | 2.5    | 0.3    | 50.6 |   |                |     |
| 10 | 3 | 3 | 4  | 5482.86                 | 100.0 | 9.3    | 100.0 | 15.5        | 5482.86         | 5482.86  | 100.0 | 4.1    | 1.7    | 56.1 |   |                |     |
| 10 | 3 | 3 | 5  | 5539.77                 | 100.0 | 2.6    | 100.0 | 2.8         | 5539.77         | 5539.77  | 100.0 | 2.9    | 0.7    | 43.1 |   |                |     |
| 15 | 3 | 2 | 1  | 6108.84                 | 100.0 | 7.4    | 100.0 | 38.9        | 6108.84         | 6108.84  | 100.0 | 21.3   | 2.8    | 36.8 |   |                |     |
| 15 | 3 | 2 | 2  | 6211.69                 | 100.0 | 4.6    | 100.0 | 51.4        | 6211.69         | 6211.69  | 100.0 | 28.3   | 6.2    | 40.9 |   |                |     |
| 15 | 3 | 2 | 3  | 6946.05                 | 100.0 | 10.9   | 100.0 | 8.7         | 6946.05         | 6946.05  | 100.0 | 21.1   | 2.2    | 38.2 |   |                |     |
| 15 | 3 | 2 | 4  | 5551.36                 | 100.0 | 4.2    | 100.0 | 44.0        | 5551.36         | 5551.36  | 100.0 | 22.8   | 5.4    | 44.0 |   |                |     |
| 15 | 3 | 2 | 5  | 5623.74                 | 100.0 | 4.6    | 100.0 | 44.7        | 5623.74         | 5623.74  | 100.0 | 29.3   | 7.8    | 45.4 |   |                |     |
| 15 | 3 | 3 | 1  | 6375.95                 | 100.0 | 11.6   | 100.0 | 45.2        | 6375.95         | 6375.95  | 100.0 | 12.9   | 3.8    | 40.0 |   |                |     |
| 15 | 3 | 3 | 2  | 6533.72                 | 100.0 | 17.5   | 100.0 | 23.5        | 6533.72         | 6533.72  | 100.0 | 26.9   | 11.7   | 43.6 |   |                |     |
| 15 | 3 | 3 | 3  | 7265.38                 | 100.0 | 14.0   | 100.0 | 32.7        | 7265.38         | 7265.38  | 100.0 | 12.7   | 3.1    | 40.9 |   |                |     |
| 15 | 3 | 3 | 4  | 5776.88                 | 100.0 | 6.7    | 100.0 | 6.9         | 5776.88         | 5776.88  | 100.0 | 14.7   | 3.4    | 45.9 |   |                |     |
| 15 | 3 | 3 | 5  | 6068.46                 | 100.0 | 32.7   | 100.0 | 87.3        | 6068.46         | 6068.46  | 100.0 | 22.7   | 9.1    | 49.3 |   |                |     |
| 20 | 3 | 2 | 1  | 7958.82                 | 100.0 | 130.1  | 100.0 | 407.3       | 7958.82         | 7958.82  | 100.0 | 307.7  | 90.9   | 36.4 |   |                |     |
| 20 | 3 | 2 | 2  | 7502.09                 | 100.0 | 19.5   | 100.0 | 21.5        | 7502.09         | 7502.09  | 100.0 | 73.5   | 13.9   | 32.2 |   |                |     |
| 20 | 3 | 2 | 3  | 8228.35                 | 100.0 | 46.0   | 100.0 | 504.1       | 8228.35         | 8228.35  | 100.0 | 120.1  | 32.3   | 34.8 |   |                |     |
| 20 | 3 | 2 | 4  | 7650.75                 | 100.0 | 60.2   | 100.0 | 6873.2      | 7650.75         | 7650.75  | 100.0 | 248.1  | 80.6   | 44.6 |   |                |     |
| 20 | 3 | 2 | 5  | 9027.46                 | 100.0 | 59.1   | 100.0 | 1024.2      | 9027.46         | 9027.46  | 100.0 | 1588.0 | 274.8  | 37.6 |   |                |     |
| 20 | 3 | 3 | 1  | 8398.63                 | 100.0 | 603.0  | 100.0 | 2058.1      | 8398.63         | 8398.63  | 100.0 | 1301.8 | 95.8   | 39.3 |   |                |     |
| 20 | 3 | 3 | 2  | 7641.45                 | 100.0 | 138.8  | 100.0 | 128.4       | 7641.45         | 7641.45  | 100.0 | 40.2   | 9.5    | 33.4 |   |                |     |
| 20 | 3 | 3 | 3  | 8624.22                 | 100.0 | 407.4  | 100.0 | 7200.0      | 8624.22         | 8624.22  | 100.0 | 331.4  | 65.0   | 37.9 |   |                |     |
| 20 | 3 | 3 | 4  | 8270.08                 | 100.0 | 811.2  | 100.0 | 7200.0      | 8270.08         | 8270.08  | 100.0 | 1508.7 | 179.3  | 48.6 |   |                |     |
| 20 | 3 | 3 | 5  | 9656.83                 | 100.0 | 892.3  | 100.0 | 3909.0      | 9656.83         | 9656.83  | 100.0 | 4731.1 | 240.4  | 41.6 |   |                |     |
| 25 | 3 | 2 | 1  | 8923.37                 | 100.0 | 55.3   | 100.0 | 80.5        | 8923.37         | 8923.37  | 100.0 | 1010.3 | 553.3  | 33.4 |   |                |     |
| 25 | 3 | 2 | 2  | 9674.07                 | 100.0 | 319.0  | 100.0 | 7152.1      | 9674.07         | 9674.07  | 100.0 | 2701.5 | 959.4  | 33.8 |   |                |     |
| 25 | 3 | 2 | 3  | <b>10368.83</b>         | 100.0 | 160.4  | 100.0 | 781.7       | 11104.06        | 10206.02 | 91.9  | 7200.8 | 7091.7 | 36.7 |   |                |     |
| 25 | 3 | 2 | 4  | 8908.31                 | 100.0 | 33.4   | 100.0 | 63.1        | 8908.31         | 8908.31  | 100.0 | 940.6  | 708.9  | 32.7 |   |                |     |
| 25 | 3 | 2 | 5  | 11037.88                | 100.0 | 44.2   | 100.0 | 26.5        | 11037.88        | 11037.88 | 100.0 | 4371.6 | 3786.4 | 27.8 |   |                |     |
| 25 | 3 | 3 | 1  | 9277.31                 | 100.0 | 234.9  | 100.0 | 1954.7      | 9277.31         | 9277.31  | 100.0 | 3860.0 | 285.3  | 36.1 |   |                |     |
| 25 | 3 | 3 | 2  | 10048.88                | 100.0 | 173.3  | 100.0 | 98.7        | 10048.88        | 10048.88 | 99.9  | 7200.2 | 542.8  | 36.4 |   |                |     |
| 25 | 3 | 3 | 3  | 11022.72                | 100.0 | 185.7  | 99.1  | 7200.0      | 11022.72        | 10982.11 | 99.6  | 7200.2 | 385.4  | 35.8 |   |                |     |
| 25 | 3 | 3 | 4  | 9334.96                 | 100.0 | 233.0  | 99.1  | 7200.0      | 9334.96         | 9334.96  | 100.0 | 1149.9 | 319.5  | 35.7 |   |                |     |
| 25 | 3 | 3 | 5  | 11715.70                | 100.0 | 1527.6 | 100.0 | 3195.1      | 11715.70        | 11549.05 | 98.6  | 7200.2 | 3420.8 | 32.1 |   |                |     |
| 30 | 3 | 3 | 1  | <b>13390.84</b>         | 100.0 | 2296.7 | 98.9  | 7200.0      | 14392.44        | 13320.81 | 92.6  | 7201.3 | 7050.4 | 33.2 |   |                |     |
| 30 | 3 | 3 | 2  | 11911.63                | 100.0 | 435.5  | 100.0 | 5334.6      | 11911.63        | 11835.94 | 99.4  | 7200.2 | 806.3  | 29.0 |   |                |     |
| 30 | 3 | 3 | 3  | 13003.14                | 100.0 | 1524.9 | 99.1  | 7200.0      | 13003.14        | 12995.29 | 99.9  | 7200.2 | 194.0  | 25.4 |   |                |     |
| 30 | 3 | 3 | 4  | 10619.39                | 100.0 | 4296.7 | 98.0  | 7200.0      | 10619.39        | 10527.89 | 99.1  | 7200.2 | 1500.9 | 33.2 |   |                |     |
| 30 | 3 | 3 | 5  | 10911.59                | 100.0 | 6708.9 | 97.6  | 7200.0      | 10911.59        | 10884.44 | 99.8  | 7200.2 | 796.1  | 29.5 |   |                |     |
| 30 | 3 | 4 | 1  | 13976.21                | 94.8  | 7200.0 | 97.3  | 7200.0      | 13976.21        | 13830.47 | 99.0  | 7200.2 | 1396.7 | 31.0 |   |                |     |
| 30 | 3 | 4 | 2  | 12525.36                | 100.0 | 2110.7 | 99.0  | 7200.0      | 12525.36        | 12294.56 | 99.8  | 7200.2 | 447.9  | 30.9 |   |                |     |
| 30 | 3 | 4 | 3  | 13234.90                | 97.6  | 7200.0 | 98.8  | 7200.0      | 13234.90        | 13234.90 | 99.8  | 7200.2 | 3617.3 | 26.9 |   |                |     |
| 30 | 3 | 4 | 4  | <b>11027.66</b>         | 95.5  | 7200.0 | 97.4  | 7200.0      | 11049.15        | 10931.71 | 98.9  | 7200.2 | 3393.2 | 36.4 |   |                |     |
| 30 | 3 | 4 | 5  | 11270.83                | 95.8  | 7200.0 | 97.1  | 7200.0      | <b>11270.83</b> | 11270.83 | 100.0 | 6844.6 | 283.1  | 31.9 |   |                |     |
| 35 | 3 | 3 | 1  | <b>12764.43</b>         | 99.7  | 7200.0 | 98.4  | 7200.0      | 13530.55        | 12694.97 | 93.8  | 7200.2 | 6962.7 | 32.1 |   |                |     |
| 35 | 3 | 3 | 2  | <b>11352.68</b>         | 100.0 | 817.2  | 98.8  | 7200.0      | 11449.35        | 11211.09 | 97.9  | 7203.2 | 6970.3 | 32.9 |   |                |     |
| 35 | 3 | 3 | 3  | <b>15278.37</b>         | 100.0 | 5074.4 | 99.4  | 7200.0      | 15566.09        | 15149.00 | 97.3  | 7200.3 | 6618.8 | 28.6 |   |                |     |
| 35 | 3 | 3 | 4  | <b>11746.39</b>         | 96.9  | 7200.0 | 97.1  | 7200.0      | 11873.09        | 11399.20 | 96.0  | 7205.1 | 7009.2 | 33.8 |   |                |     |
| 35 | 3 | 3 | 5  | <b>11881.10</b>         | 98.5  | 7200.0 | 99.3  | 7200.0      | 11946.74        | 11821.76 | 99.0  | 7200.3 | 2379.2 | 29.9 |   |                |     |
| 35 | 3 | 4 | 1  | 13426.45                | 93.8  | 7200.0 | 96.0  | 7200.0      | <b>13296.40</b> | 13140.71 | 98.8  | 7200.2 | 1841.2 | 30.9 |   |                |     |
| 35 | 3 | 4 | 2  | <b>11786.79</b>         | 99.0  | 7200.0 | 97.8  | 7200.0      | 12352.07        | 11560.36 | 93.6  | 7204.9 | 7007.2 | 38.0 |   |                |     |
| 35 | 3 | 4 | 3  | <b>16151.59</b>         | 94.8  | 7200.0 | 95.7  | 7200.0      | 16699.15        | 15725.52 | 94.2  | 7227.3 | 7016.8 | 33.1 |   |                |     |
| 35 | 3 | 4 | 4  | 12295.65                | 91.7  | 7200.0 | 95.5  | 7200.0      | <b>12160.17</b> | 11944.50 | 98.2  | 7200.2 | 2744.1 | 35.4 |   |                |     |
| 35 | 3 | 4 | 5  | 12701.76                | 92.7  | 7200.0 | 94.9  | 7200.0      | <b>12448.27</b> | 12263.81 | 98.5  | 7203.0 | 7010.6 | 32.7 |   |                |     |
| 40 | 3 | 3 | 1  | <b>14733.71</b>         | 97.4  | 7200.0 | 97.9  | 7200.0      | -               | 14707.52 | -     | 7207.6 | 6560.4 | -    |   |                |     |
| 40 | 3 | 3 | 2  | <b>12267.02</b>         | 100.0 | 6515.8 | 100.0 | 4039.2      | 13699.71        | 11987.27 | 87.5  | 7202.7 | 6724.4 | 39.0 |   |                |     |
| 40 | 3 | 3 | 3  | <b>14525.45</b>         | 99.5  | 7200.0 | 99.1  | 7200.0      | 15289.70        | 14235.11 | 93.1  | 7206.1 | 6897.4 | 29.0 |   |                |     |
| 40 | 3 | 3 | 4  | <b>12401.25</b>         | 99.3  | 7200.0 | 98.0  | 7200.0      | 12571.11        | 12178.95 | 96.9  | 7206.0 | 7044.1 | 31.1 |   |                |     |
| 40 | 3 | 3 | 5  | <b>14143.72</b>         | 100.0 | 5384.6 | 98.5  | 7200.0      | 16256.25        | 14121.72 | 86.9  | 7208.1 | 7002.3 | 35.1 |   |                |     |
| 40 | 3 | 4 | 1  | 16057.77                | 89.7  | 7200.0 | 91.7  | 7200.0      | <b>15701.07</b> | 15232.85 | 97.0  | 7202.3 | 7017.6 | 31.2 |   |                |     |
| 40 | 3 | 4 | 2  | 13022.49                | 93.0  | 7200.0 | 95.6  | 7200.0      | <b>12940.30</b> | 12568.74 | 97.1  | 7202.8 | 6929.8 | 35.4 |   |                |     |
| 40 | 3 | 4 | 3  | <b>14898.49</b>         | 96.3  | 7200.0 | 98.0  | 7200.0      | 15005.16        | 14677.13 | 97.8  | 7200.2 | 1786.5 | 27.7 |   |                |     |
| 40 | 3 | 4 | 4  | <b>12725.05</b>         | 93.8  | 7200.0 | 97.7  | 7200.0      | 12736.43        | 12571.78 | 98.7  | 7200.6 | 3602.3 | 32.1 |   |                |     |
| 40 | 3 | 4 | 5  | 14763.54                | 95.6  | 7200.0 | 96.3  | 7200.0      | <b>14721.19</b> | 14504.47 | 98.5  | 7200.5 | 6002.3 | 28.1 |   |                |     |
| 45 | 3 | 3 | 1  | <b>15327.90</b>         | n/a   | n/a    | n/a   | n/a         | 17526.21        | 15259.30 | 87.1  | 7200.5 | 6909.8 | 34.9 |   |                |     |
| 45 | 3 | 3 | 2  | <b>14818.70</b>         | n/a   | n/a    | n/a   | n/a         | -               | 14679.11 | -     | 7202.3 | 6824.8 | -    |   |                |     |
| 45 | 3 | 3 | 3  | <b>15744.72</b>         | n/a   | n/a    | n/a   | n/a         | 16425.69        | 15476.52 | 94.2  | 7205.7 | 6387.6 | 25.9 |   |                |     |
| 45 | 3 | 3 | 4  | <b>15015.64</b>         | n/a   |        |       |             |                 |          |       |        |        |      |   |                |     |

Table 3: Results on multi-vehicle VMIRP instances with six periods and low inventory costs

| $n$ | $l$ | $m$ | $id$ | Adulyasak et al. (2014) |       |        |       |             |                 |          |       | EXM    |        |        |     |       |        |
|-----|-----|-----|------|-------------------------|-------|--------|-------|-------------|-----------------|----------|-------|--------|--------|--------|-----|-------|--------|
|     |     |     |      | Veh-Ind                 |       |        |       | Non-Veh-Ind |                 |          |       | $ub$   | $lb$   | $\%lb$ | $t$ | $t_S$ | $\%rc$ |
|     |     |     |      | Best                    | $ub$  | $\%lb$ | $t$   | $\%lb$      | $t$             | $\%lb$   | $t$   |        |        |        |     |       |        |
| 5   | 6   | 2   | 1    | 4286.37                 | 100.0 | 2.2    | 100.0 | 7.0         | 4286.37         | 4286.37  | 100.0 | 1.5    | 0.3    | 93.4   |     |       |        |
| 5   | 6   | 2   | 2    | 3869.33                 | 100.0 | 3.1    | 100.0 | 12.9        | 3869.33         | 3869.33  | 100.0 | 2.0    | 0.5    | 93.2   |     |       |        |
| 5   | 6   | 2   | 3    | 5997.42                 | 100.0 | 0.6    | 100.0 | 1.2         | 5997.42         | 5997.42  | 100.0 | 1.0    | 0.1    | 96.0   |     |       |        |
| 5   | 6   | 2   | 4    | 3814.27                 | 100.0 | 1.2    | 100.0 | 1.3         | 3814.27         | 3814.27  | 100.0 | 1.2    | 0.2    | 94.5   |     |       |        |
| 5   | 6   | 2   | 5    | 3062.01                 | 100.0 | 0.5    | 100.0 | 0.8         | 3062.01         | 3062.01  | 100.0 | 1.3    | 0.2    | 92.0   |     |       |        |
| 5   | 6   | 3   | 1    | 5258.03                 | 100.0 | 0.3    | 100.0 | 1.5         | 5258.03         | 5258.03  | 100.0 | 0.9    | 0.0    | 94.6   |     |       |        |
| 5   | 6   | 3   | 2    | 4881.51                 | 100.0 | 0.1    | 100.0 | 0.1         | 4881.51         | 4881.51  | 100.0 | 0.9    | 0.1    | 94.7   |     |       |        |
| 5   | 6   | 3   | 3    | 10555.98                | 100.0 | 0.0    | 100.0 | 1.5         | 10555.98        | 10555.98 | 100.0 | 1.4    | 0.1    | 97.7   |     |       |        |
| 5   | 6   | 3   | 4    | 5028.36                 | 100.0 | 0.3    | 100.0 | 14.2        | 5028.36         | 5028.36  | 100.0 | 1.0    | 0.1    | 95.8   |     |       |        |
| 5   | 6   | 3   | 5    | 4392.47                 | 100.0 | 0.2    | 100.0 | 0.9         | 4392.47         | 4392.47  | 100.0 | 1.3    | 0.0    | 94.3   |     |       |        |
| 10  | 6   | 2   | 1    | 5923.33                 | 100.0 | 181.3  | 96.4  | 7200.0      | 5923.33         | 5923.33  | 100.0 | 177.7  | 11.4   | 91.9   |     |       |        |
| 10  | 6   | 2   | 2    | 6927.65                 | 100.0 | 621.0  | 100.0 | 598.2       | 6927.65         | 6927.65  | 100.0 | 2199.4 | 10.2   | 94.6   |     |       |        |
| 10  | 6   | 2   | 3    | 5533.68                 | 100.0 | 118.2  | 100.0 | 723.2       | 5533.68         | 5533.68  | 100.0 | 511.2  | 12.0   | 92.2   |     |       |        |
| 10  | 6   | 2   | 4    | 6463.46                 | 100.0 | 79.7   | 100.0 | 2585.2      | 6463.46         | 6463.46  | 100.0 | 293.4  | 16.2   | 93.5   |     |       |        |
| 10  | 6   | 2   | 5    | 5441.76                 | 100.0 | 97.8   | 100.0 | 371.9       | 5441.76         | 5441.76  | 100.0 | 1391.5 | 6.0    | 89.8   |     |       |        |
| 10  | 6   | 3   | 1    | 7535.66                 | 95.8  | 7200.0 | 91.5  | 7200.0      | 7535.66         | 7535.66  | 100.0 | 176.1  | 11.9   | 93.6   |     |       |        |
| 10  | 6   | 3   | 2    | 8594.37                 | 100.0 | 6709.7 | 100.0 | 7200.0      | 8594.37         | 8594.37  | 100.0 | 290.0  | 15.4   | 95.7   |     |       |        |
| 10  | 6   | 3   | 3    | 6604.50                 | 100.0 | 655.8  | 100.0 | 2816.0      | 6604.50         | 6604.50  | 100.0 | 829.1  | 9.4    | 93.5   |     |       |        |
| 10  | 6   | 3   | 4    | 7891.84                 | 100.0 | 2387.7 | 95.7  | 7200.0      | 7891.84         | 7891.84  | 100.0 | 1031.9 | 15.1   | 94.7   |     |       |        |
| 10  | 6   | 3   | 5    | 6253.99                 | 100.0 | 1571.1 | 100.0 | 2828.9      | 6253.99         | 6253.99  | 100.0 | 260.5  | 8.1    | 91.2   |     |       |        |
| 15  | 6   | 2   | 1    | <b>6143.34</b>          | 100.0 | 654.2  | 96.1  | 7200.0      | 6165.38         | 6001.02  | 97.3  | 7200.3 | 33.7   | 88.1   |     |       |        |
| 15  | 6   | 2   | 2    | <b>6382.11</b>          | 100.0 | 203.4  | 98.9  | 7200.0      | 6383.11         | 6222.30  | 97.5  | 7200.2 | 69.1   | 88.8   |     |       |        |
| 15  | 6   | 2   | 3    | 7239.38                 | 100.0 | 1062.1 | 95.2  | 7200.0      | 7239.38         | 7095.81  | 98.0  | 7200.4 | 48.4   | 88.6   |     |       |        |
| 15  | 6   | 2   | 4    | <b>6465.37</b>          | 100.0 | 720.6  | 97.0  | 7200.0      | 6494.35         | 6260.01  | 96.4  | 7200.2 | 92.3   | 91.2   |     |       |        |
| 15  | 6   | 2   | 5    | <b>6669.99</b>          | 100.0 | 1040.3 | 94.7  | 7200.0      | 6875.90         | 6413.55  | 93.3  | 7200.2 | 137.1  | 91.7   |     |       |        |
| 15  | 6   | 3   | 1    | <b>7137.36</b>          | 92.9  | 7200.0 | 91.9  | 7200.0      | 7304.36         | 6942.96  | 95.1  | 7200.2 | 99.8   | 90.0   |     |       |        |
| 15  | 6   | 3   | 2    | <b>7559.90</b>          | 95.7  | 7200.0 | 93.1  | 7200.0      | 7649.50         | 7292.03  | 95.3  | 7200.2 | 104.9  | 90.6   |     |       |        |
| 15  | 6   | 3   | 3    | <b>8465.21</b>          | 92.8  | 7200.0 | 91.4  | 7200.0      | 8539.91         | 8310.14  | 97.3  | 7200.2 | 104.4  | 90.3   |     |       |        |
| 15  | 6   | 3   | 4    | <b>7604.86</b>          | 94.0  | 7200.0 | 92.8  | 7200.0      | 7618.82         | 7352.53  | 96.5  | 7200.2 | 84.6   | 92.5   |     |       |        |
| 15  | 6   | 3   | 5    | <b>8046.60</b>          | 91.9  | 7200.0 | 92.4  | 7200.0      | 8224.07         | 7681.01  | 93.4  | 7200.2 | 218.1  | 93.1   |     |       |        |
| 20  | 6   | 2   | 1    | <b>7704.14</b>          | n/a   | n/a    | n/a   | n/a         | 8086.34         | 7330.65  | 90.7  | 7200.2 | 2426.7 | 88.8   |     |       |        |
| 20  | 6   | 2   | 2    | <b>6569.33</b>          | n/a   | n/a    | n/a   | n/a         | 6675.70         | 6379.43  | 95.6  | 7200.3 | 452.5  | 85.6   |     |       |        |
| 20  | 6   | 2   | 3    | <b>7781.52</b>          | n/a   | n/a    | n/a   | n/a         | 8013.64         | 7532.06  | 94.0  | 7200.2 | 401.2  | 89.4   |     |       |        |
| 20  | 6   | 2   | 4    | <b>8746.71</b>          | n/a   | n/a    | n/a   | n/a         | 9128.25         | 8294.62  | 90.9  | 7200.3 | 1596.3 | 91.4   |     |       |        |
| 20  | 6   | 2   | 5    | <b>8968.73</b>          | n/a   | n/a    | n/a   | n/a         | 9377.61         | 8479.43  | 90.4  | 7204.4 | 1681.6 | 89.7   |     |       |        |
| 20  | 6   | 3   | 1    | <b>9690.78</b>          | n/a   | n/a    | n/a   | n/a         | 9860.50         | 8842.56  | 89.7  | 7200.2 | 1181.9 | 90.8   |     |       |        |
| 20  | 6   | 3   | 2    | <b>7477.33</b>          | n/a   | n/a    | n/a   | n/a         | 7527.54         | 7040.63  | 93.5  | 7200.2 | 236.8  | 87.2   |     |       |        |
| 20  | 6   | 3   | 3    | <b>9335.74</b>          | n/a   | n/a    | n/a   | n/a         | 9080.12         | 8574.27  | 94.4  | 7200.2 | 181.9  | 90.6   |     |       |        |
| 20  | 6   | 3   | 4    | 10989.06                | n/a   | n/a    | n/a   | n/a         | <b>10846.92</b> | 10028.15 | 92.5  | 7200.2 | 433.2  | 92.7   |     |       |        |
| 20  | 6   | 3   | 5    | 11826.34                | n/a   | n/a    | n/a   | n/a         | <b>11357.43</b> | 10557.12 | 93.0  | 7200.2 | 4056.8 | 91.5   |     |       |        |
| 25  | 6   | 2   | 1    | <b>7892.30</b>          | n/a   | n/a    | n/a   | n/a         | 8657.11         | 7573.02  | 87.5  | 7200.2 | 6616.6 | 89.2   |     |       |        |
| 25  | 6   | 2   | 2    | <b>8667.63</b>          | n/a   | n/a    | n/a   | n/a         | 9780.01         | 8260.99  | 84.5  | 7202.8 | 6873.2 | 89.5   |     |       |        |
| 25  | 6   | 2   | 3    | <b>8950.41</b>          | n/a   | n/a    | n/a   | n/a         | 9754.76         | 8739.19  | 89.6  | 7200.2 | 6788.5 | 88.1   |     |       |        |
| 25  | 6   | 2   | 4    | <b>7954.64</b>          | n/a   | n/a    | n/a   | n/a         | 8549.26         | 7814.72  | 91.4  | 7202.0 | 6990.8 | 88.5   |     |       |        |
| 25  | 6   | 2   | 5    | <b>9049.47</b>          | n/a   | n/a    | n/a   | n/a         | 9374.68         | 8587.22  | 91.6  | 7202.8 | 6451.6 | 86.3   |     |       |        |
| 25  | 6   | 3   | 1    | <b>9024.73</b>          | n/a   | n/a    | n/a   | n/a         | 9375.30         | 8420.46  | 89.8  | 7200.2 | 1541.7 | 90.0   |     |       |        |
| 25  | 6   | 3   | 2    | 11136.70                | n/a   | n/a    | n/a   | n/a         | <b>10430.03</b> | 9662.85  | 92.6  | 7200.3 | 3034.9 | 90.1   |     |       |        |
| 25  | 6   | 3   | 3    | <b>11320.78</b>         | n/a   | n/a    | n/a   | n/a         | 14146.16        | 10398.27 | 73.5  | 7200.3 | 7000.5 | 91.8   |     |       |        |
| 25  | 6   | 3   | 4    | <b>9233.14</b>          | n/a   | n/a    | n/a   | n/a         | 9338.73         | 8760.84  | 93.8  | 7200.3 | 1917.9 | 89.5   |     |       |        |
| 25  | 6   | 3   | 5    | 11760.03                | n/a   | n/a    | n/a   | n/a         | <b>11037.56</b> | 10346.64 | 93.7  | 7200.3 | 1671.5 | 88.4   |     |       |        |
| 30  | 6   | 3   | 1    | n/a                     | n/a   | n/a    | n/a   | n/a         | 14115.87        | 10493.40 | 74.3  | 7202.1 | 6910.6 | 88.4   |     |       |        |
| 30  | 6   | 3   | 2    | n/a                     | n/a   | n/a    | n/a   | n/a         | 10323.19        | 9334.39  | 90.4  | 7202.3 | 6924.4 | 86.7   |     |       |        |
| 30  | 6   | 3   | 3    | n/a                     | n/a   | n/a    | n/a   | n/a         | 10449.54        | 9428.62  | 90.2  | 7208.8 | 5297.7 | 83.8   |     |       |        |
| 30  | 6   | 3   | 4    | n/a                     | n/a   | n/a    | n/a   | n/a         | 10719.44        | 9183.27  | 85.7  | 7200.2 | 6954.6 | 89.5   |     |       |        |
| 30  | 6   | 3   | 5    | n/a                     | n/a   | n/a    | n/a   | n/a         | 10071.78        | 9058.20  | 89.9  | 7203.5 | 6262.8 | 87.1   |     |       |        |
| 30  | 6   | 4   | 1    | n/a                     | n/a   | n/a    | n/a   | n/a         | 13066.99        | 12092.09 | 92.5  | 7200.3 | 3482.9 | 87.4   |     |       |        |
| 30  | 6   | 4   | 2    | n/a                     | n/a   | n/a    | n/a   | n/a         | 11914.42        | 10647.63 | 89.4  | 7200.3 | 2290.7 | 88.5   |     |       |        |
| 30  | 6   | 4   | 3    | n/a                     | n/a   | n/a    | n/a   | n/a         | 11269.56        | 10341.72 | 91.8  | 7200.2 | 1508.8 | 85.0   |     |       |        |
| 30  | 6   | 4   | 4    | n/a                     | n/a   | n/a    | n/a   | n/a         | 11881.20        | 10446.30 | 87.9  | 7200.7 | 6699.0 | 90.5   |     |       |        |
| 30  | 6   | 4   | 5    | n/a                     | n/a   | n/a    | n/a   | n/a         | 11407.76        | 10232.09 | 89.7  | 7200.2 | 2292.0 | 88.6   |     |       |        |

Table 4: Results on multi-vehicle VMIRP instances with six periods and high inventory costs

| $n$ | $l$ | $m$ | $id$ | Adulyasak et al. (2014) |         |        |             |        |                 |          |        | EXM    |        |        |  |  |
|-----|-----|-----|------|-------------------------|---------|--------|-------------|--------|-----------------|----------|--------|--------|--------|--------|--|--|
|     |     |     |      | Best $ub$               | Veh-Ind |        | Non-Veh-Ind |        | $ub$            | $lb$     | $\%lb$ | $t$    | $t_S$  | $\%rc$ |  |  |
|     |     |     |      |                         | $\%lb$  | $t$    | $\%lb$      | $t$    |                 |          |        |        |        |        |  |  |
| 5   | 6   | 2   | 1    | 6888.73                 | 100.0   | 2.0    | 100.0       | 3.5    | 6888.73         | 6888.73  | 100.0  | 1.7    | 0.3    | 58.1   |  |  |
| 5   | 6   | 2   | 2    | 6202.65                 | 100.0   | 2.4    | 100.0       | 15.5   | 6202.65         | 6202.65  | 100.0  | 2.3    | 0.5    | 58.3   |  |  |
| 5   | 6   | 2   | 3    | 8183.76                 | 100.0   | 1.0    | 100.0       | 1.2    | 8183.76         | 8183.76  | 100.0  | 1.0    | 0.1    | 70.3   |  |  |
| 5   | 6   | 2   | 4    | 5726.62                 | 100.0   | 1.1    | 100.0       | 1.3    | 5726.62         | 5726.62  | 100.0  | 1.1    | 0.1    | 62.9   |  |  |
| 5   | 6   | 2   | 5    | 5234.05                 | 100.0   | 0.5    | 100.0       | 0.6    | 5234.05         | 5234.05  | 100.0  | 1.1    | 0.1    | 53.8   |  |  |
| 5   | 6   | 3   | 1    | 7864.79                 | 100.0   | 0.2    | 100.0       | 0.8    | 7864.79         | 7864.79  | 100.0  | 0.8    | 0.0    | 63.2   |  |  |
| 5   | 6   | 3   | 2    | 7174.59                 | 100.0   | 0.1    | 100.0       | 0.1    | 7174.59         | 7174.59  | 100.0  | 0.8    | 0.1    | 64.4   |  |  |
| 5   | 6   | 3   | 3    | 12780.57                | 100.0   | 0.0    | 100.0       | 0.3    | 12780.57        | 12780.57 | 100.0  | 0.8    | 0.1    | 80.7   |  |  |
| 5   | 6   | 3   | 4    | 6933.86                 | 100.0   | 0.3    | 100.0       | 18.0   | 6933.86         | 6933.86  | 100.0  | 0.9    | 0.1    | 69.5   |  |  |
| 5   | 6   | 3   | 5    | 6593.51                 | 100.0   | 0.2    | 100.0       | 0.9    | 6593.51         | 6593.51  | 100.0  | 0.7    | 0.0    | 62.8   |  |  |
| 10  | 6   | 2   | 1    | 10294.48                | 100.0   | 240.2  | 99.2        | 7200.0 | 10294.48        | 10294.48 | 100.0  | 177.2  | 6.2    | 52.9   |  |  |
| 10  | 6   | 2   | 2    | 10265.25                | 100.0   | 785.2  | 100.0       | 1944.9 | 10265.25        | 10265.25 | 100.0  | 2182.1 | 27.5   | 63.9   |  |  |
| 10  | 6   | 2   | 3    | 9400.47                 | 100.0   | 102.9  | 100.0       | 669.0  | 9400.47         | 9400.47  | 100.0  | 420.6  | 9.8    | 54.3   |  |  |
| 10  | 6   | 2   | 4    | 10161.40                | 100.0   | 150.7  | 100.0       | 1986.1 | 10161.40        | 10161.40 | 100.0  | 302.2  | 10.8   | 59.5   |  |  |
| 10  | 6   | 2   | 5    | 10391.07                | 100.0   | 82.9   | 100.0       | 341.9  | 10391.07        | 10391.07 | 100.0  | 316.4  | 6.5    | 47.1   |  |  |
| 10  | 6   | 3   | 1    | 11900.94                | 96.4    | 7200.0 | 94.4        | 7200.0 | 11900.94        | 11900.94 | 100.0  | 111.8  | 9.5    | 59.3   |  |  |
| 10  | 6   | 3   | 2    | 11929.85                | 100.0   | 5313.3 | 99.4        | 7200.0 | 11929.85        | 11929.85 | 100.0  | 133.6  | 11.3   | 68.9   |  |  |
| 10  | 6   | 3   | 3    | 10456.78                | 100.0   | 871.2  | 100.0       | 2929.3 | 10456.78        | 10456.78 | 100.0  | 1258.2 | 10.2   | 59.0   |  |  |
| 10  | 6   | 3   | 4    | 11598.75                | 100.0   | 2521.3 | 95.6        | 7200.0 | 11598.75        | 11598.75 | 100.0  | 1354.5 | 12.9   | 64.4   |  |  |
| 10  | 6   | 3   | 5    | 11192.68                | 100.0   | 1903.0 | 100.0       | 1962.0 | 11192.68        | 11192.68 | 100.0  | 268.6  | 7.2    | 51.0   |  |  |
| 15  | 6   | 2   | 1    | <b>12825.51</b>         | 100.0   | 246.4  | 97.7        | 7200.0 | 12830.99        | 12648.57 | 98.6   | 7200.2 | 41.0   | 42.4   |  |  |
| 15  | 6   | 2   | 2    | <b>12821.22</b>         | 100.0   | 263.1  | 99.4        | 7200.0 | 12826.37        | 12623.23 | 98.4   | 7200.3 | 58.3   | 44.3   |  |  |
| 15  | 6   | 2   | 3    | <b>14733.15</b>         | 100.0   | 1251.9 | 97.6        | 7200.0 | 14796.15        | 14582.63 | 98.6   | 7200.3 | 44.7   | 43.8   |  |  |
| 15  | 6   | 2   | 4    | <b>11592.15</b>         | 100.0   | 555.8  | 98.1        | 7200.0 | 11605.05        | 11442.76 | 98.6   | 7200.2 | 92.4   | 50.9   |  |  |
| 15  | 6   | 2   | 5    | 11748.70                | 100.0   | 1498.5 | 97.8        | 7200.0 | 11748.70        | 11504.56 | 97.9   | 7200.2 | 118.3  | 51.9   |  |  |
| 15  | 6   | 3   | 1    | 13785.72                | 96.5    | 7200.0 | 95.6        | 7200.0 | 13785.72        | 13624.12 | 98.8   | 7200.2 | 82.5   | 46.5   |  |  |
| 15  | 6   | 3   | 2    | <b>14009.39</b>         | 97.0    | 7200.0 | 96.3        | 7200.0 | 14095.52        | 13693.86 | 97.2   | 7200.2 | 113.0  | 49.2   |  |  |
| 15  | 6   | 3   | 3    | <b>15974.42</b>         | 95.5    | 7200.0 | 95.2        | 7200.0 | 16012.42        | 15791.81 | 98.6   | 7200.2 | 72.9   | 47.9   |  |  |
| 15  | 6   | 3   | 4    | <b>12734.73</b>         | 97.4    | 7200.0 | 96.1        | 7200.0 | 12887.45        | 12449.05 | 96.6   | 7200.3 | 141.1  | 55.8   |  |  |
| 15  | 6   | 3   | 5    | <b>13134.22</b>         | 95.5    | 7200.0 | 94.9        | 7200.0 | 13232.49        | 12715.72 | 96.1   | 7200.3 | 155.7  | 57.5   |  |  |
| 20  | 6   | 2   | 1    | <b>15946.57</b>         | n/a     | n/a    | n/a         | n/a    | 16098.83        | 15393.92 | 95.6   | 7200.3 | 2600.4 | 43.3   |  |  |
| 20  | 6   | 2   | 2    | <b>15144.35</b>         | n/a     | n/a    | n/a         | n/a    | 15191.83        | 14882.20 | 98.0   | 7200.3 | 260.8  | 37.4   |  |  |
| 20  | 6   | 2   | 3    | <b>15366.82</b>         | n/a     | n/a    | n/a         | n/a    | 15503.94        | 14968.21 | 96.5   | 7200.3 | 442.9  | 45.6   |  |  |
| 20  | 6   | 2   | 4    | <b>15850.97</b>         | n/a     | n/a    | n/a         | n/a    | 16274.16        | 15242.53 | 93.7   | 7200.3 | 1118.5 | 51.5   |  |  |
| 20  | 6   | 2   | 5    | <b>17654.71</b>         | n/a     | n/a    | n/a         | n/a    | 17909.43        | 16972.18 | 94.8   | 7200.3 | 1527.5 | 46.1   |  |  |
| 20  | 6   | 3   | 1    | <b>17853.11</b>         | n/a     | n/a    | n/a         | n/a    | 17932.95        | 16974.28 | 94.7   | 7200.2 | 821.3  | 48.9   |  |  |
| 20  | 6   | 3   | 2    | <b>15939.81</b>         | n/a     | n/a    | n/a         | n/a    | 15982.33        | 15498.24 | 97.0   | 7200.3 | 232.5  | 40.4   |  |  |
| 20  | 6   | 3   | 3    | 16871.90                | n/a     | n/a    | n/a         | n/a    | <b>16825.56</b> | 16027.68 | 95.3   | 7200.3 | 248.2  | 49.9   |  |  |
| 20  | 6   | 3   | 4    | 18130.74                | n/a     | n/a    | n/a         | n/a    | <b>17834.74</b> | 16987.27 | 95.2   | 7200.2 | 581.4  | 55.7   |  |  |
| 20  | 6   | 3   | 5    | 20298.58                | n/a     | n/a    | n/a         | n/a    | 20429.06        | 19003.73 | 93.0   | 7200.3 | 835.4  | 52.8   |  |  |
| 25  | 6   | 2   | 1    | <b>16383.06</b>         | n/a     | n/a    | n/a         | n/a    | 16915.50        | 15868.56 | 93.8   | 7200.7 | 6402.9 | 44.4   |  |  |
| 25  | 6   | 2   | 2    | <b>18060.15</b>         | n/a     | n/a    | n/a         | n/a    | 20127.08        | 17275.64 | 85.8   | 7205.1 | 7026.8 | 48.6   |  |  |
| 25  | 6   | 2   | 3    | <b>19352.31</b>         | n/a     | n/a    | n/a         | n/a    | 20406.40        | 18873.77 | 92.5   | 7201.1 | 7097.1 | 43.5   |  |  |
| 25  | 6   | 2   | 4    | <b>16781.57</b>         | n/a     | n/a    | n/a         | n/a    | 17181.65        | 16388.07 | 95.4   | 7205.9 | 6825.6 | 43.1   |  |  |
| 25  | 6   | 2   | 5    | <b>20682.66</b>         | n/a     | n/a    | n/a         | n/a    | 22370.02        | 19923.07 | 89.1   | 7205.5 | 6941.5 | 42.5   |  |  |
| 25  | 6   | 3   | 1    | <b>17426.30</b>         | n/a     | n/a    | n/a         | n/a    | 17832.54        | 16705.73 | 93.7   | 7200.3 | 1290.5 | 47.1   |  |  |
| 25  | 6   | 3   | 2    | 20477.42                | n/a     | n/a    | n/a         | n/a    | <b>19624.32</b> | 18790.26 | 95.7   | 7200.3 | 2616.6 | 47.2   |  |  |
| 25  | 6   | 3   | 3    | <b>21748.29</b>         | n/a     | n/a    | n/a         | n/a    | 21910.48        | 20570.19 | 93.9   | 7200.3 | 1630.2 | 47.4   |  |  |
| 25  | 6   | 3   | 4    | <b>18001.88</b>         | n/a     | n/a    | n/a         | n/a    | 18240.43        | 17357.35 | 95.2   | 7200.3 | 2856.9 | 46.3   |  |  |
| 25  | 6   | 3   | 5    | 23562.27                | n/a     | n/a    | n/a         | n/a    | -               | 21688.16 | -      | 7203.9 | 7115.1 | -      |  |  |
| 30  | 6   | 3   | 1    | n/a                     | n/a     | n/a    | n/a         | n/a    | 27412.68        | 25034.46 | 91.3   | 7204.6 | 6913.0 | 39.9   |  |  |
| 30  | 6   | 3   | 2    | n/a                     | n/a     | n/a    | n/a         | n/a    | 22580.76        | 21445.55 | 95.0   | 7208.8 | 3137.7 | 39.4   |  |  |
| 30  | 6   | 3   | 3    | n/a                     | n/a     | n/a    | n/a         | n/a    | 25523.43        | 24282.77 | 95.1   | 7200.3 | 1979.3 | 34.1   |  |  |
| 30  | 6   | 3   | 4    | n/a                     | n/a     | n/a    | n/a         | n/a    | 20686.07        | 18930.76 | 91.5   | 7205.4 | 6402.6 | 45.9   |  |  |
| 30  | 6   | 3   | 5    | n/a                     | n/a     | n/a    | n/a         | n/a    | 21665.65        | 20412.67 | 94.2   | 7206.8 | 4814.3 | 40.4   |  |  |
| 30  | 6   | 4   | 1    | n/a                     | n/a     | n/a    | n/a         | n/a    | 28197.79        | 26702.31 | 94.7   | 7200.2 | 1828.9 | 41.5   |  |  |
| 30  | 6   | 4   | 2    | n/a                     | n/a     | n/a    | n/a         | n/a    | 24124.71        | 22720.94 | 94.2   | 7200.3 | 4235.9 | 43.2   |  |  |
| 30  | 6   | 4   | 3    | n/a                     | n/a     | n/a    | n/a         | n/a    | 26545.07        | 25212.25 | 95.0   | 7200.3 | 1282.1 | 36.7   |  |  |
| 30  | 6   | 4   | 4    | n/a                     | n/a     | n/a    | n/a         | n/a    | 21976.70        | 20205.37 | 91.9   | 7200.2 | 4461.9 | 49.1   |  |  |
| 30  | 6   | 4   | 5    | n/a                     | n/a     | n/a    | n/a         | n/a    | 22854.80        | 21564.19 | 94.4   | 7200.2 | 1673.7 | 43.6   |  |  |
